# Supplementary material
Source: MDPI journal article supplement (https://www.mdpi.com/2220-9964/6/5/153)

$$B_{\alpha} = [111] // B_{\chi} = [111]$$

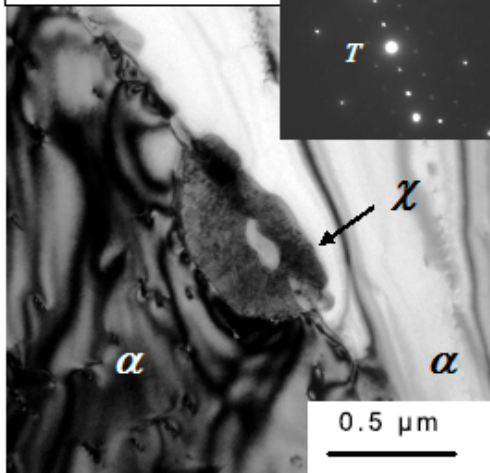

(a)

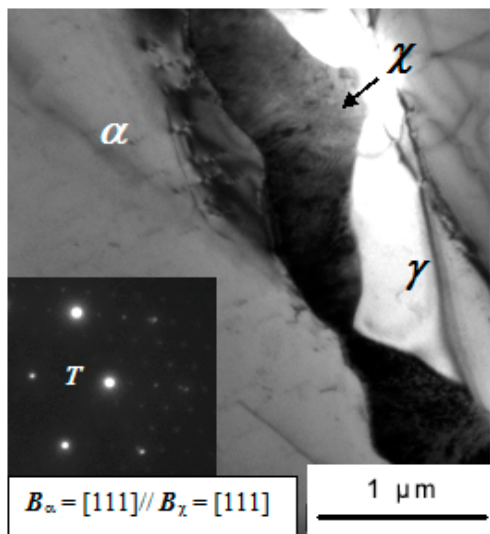

(b)

Supplement: s1 [file s1]

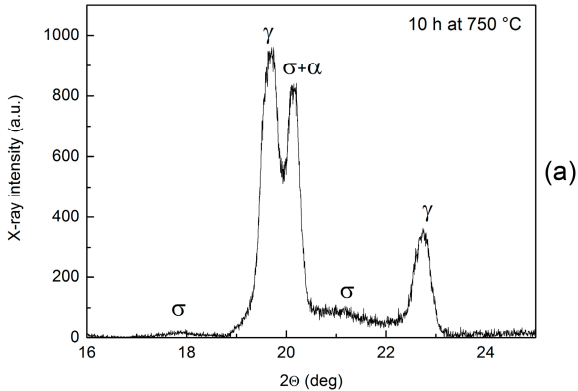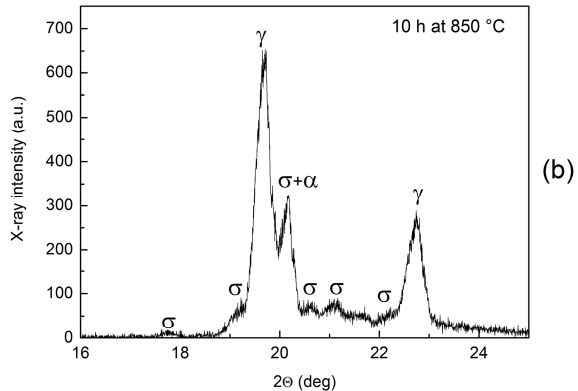

Supplement: s1 [file s1]

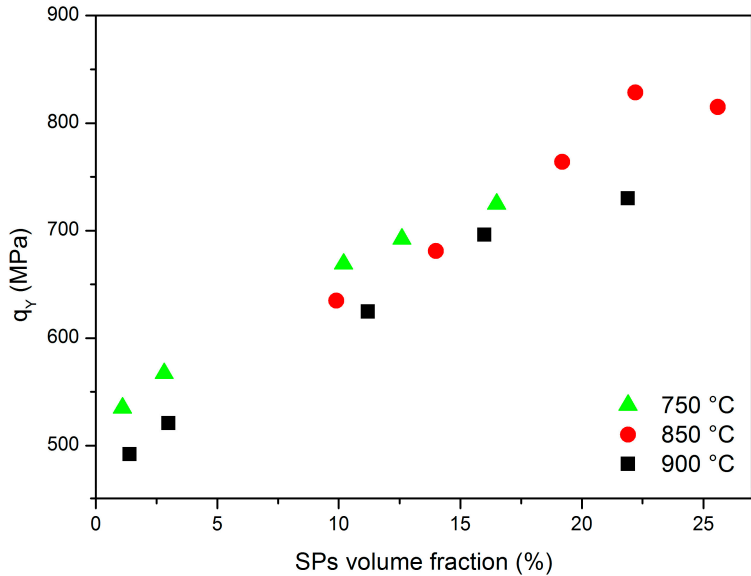

Supplement: s1 [file s1]

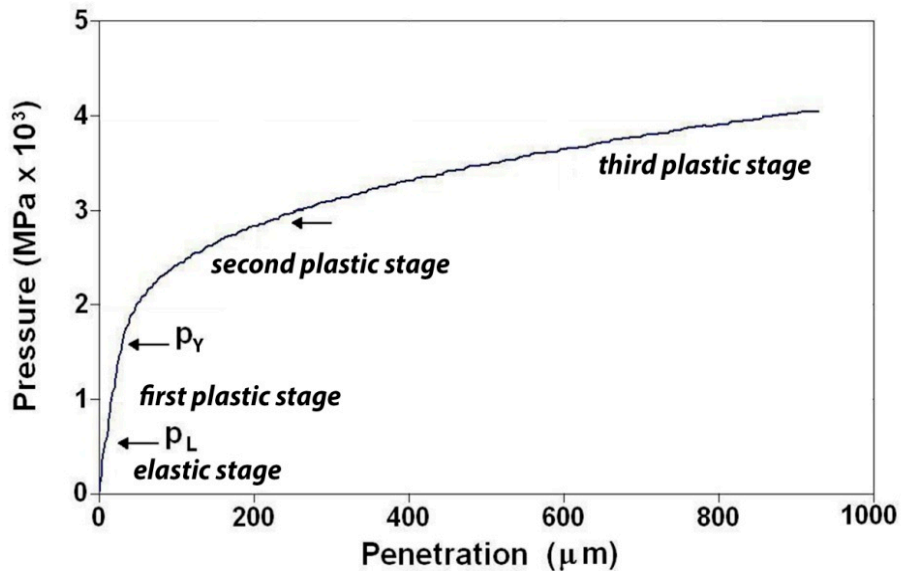

Supplement: s1 [file s1]

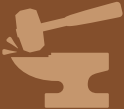

*metals*

Supplement: s1 [file s1]

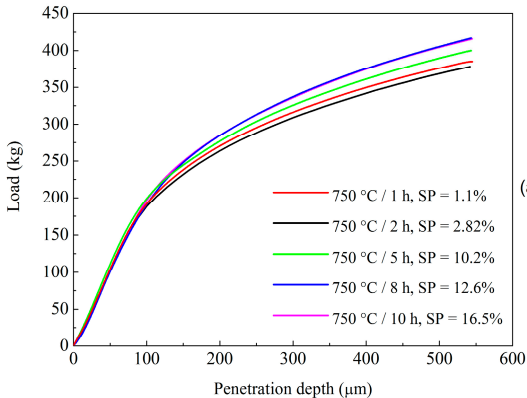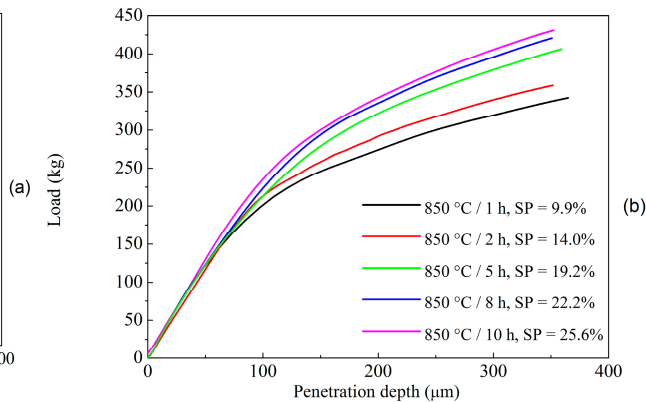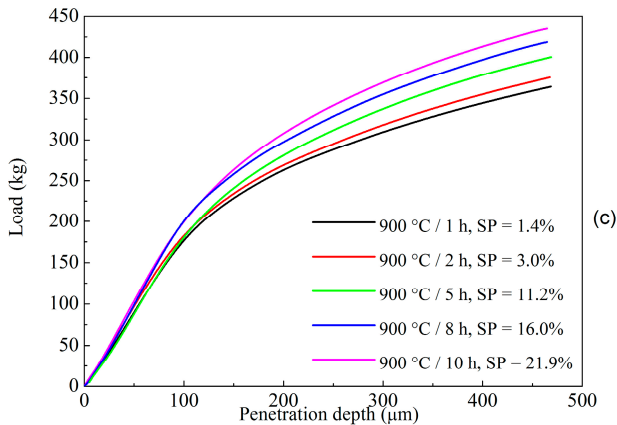

Supplement: s1 [file s1]

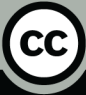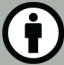

BY

Supplement: s1 [file s1]

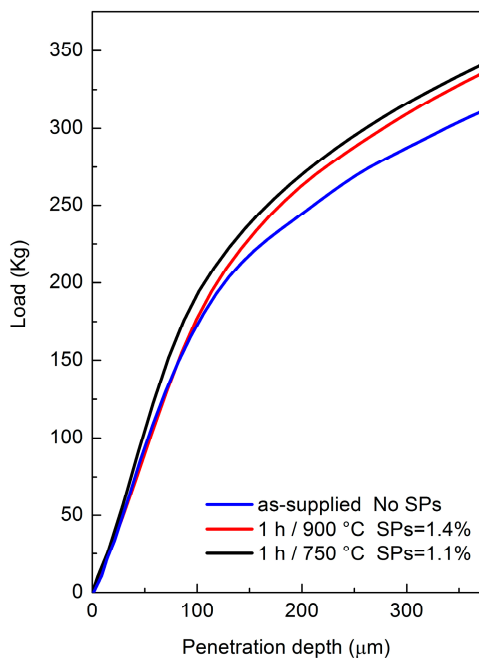

(a)

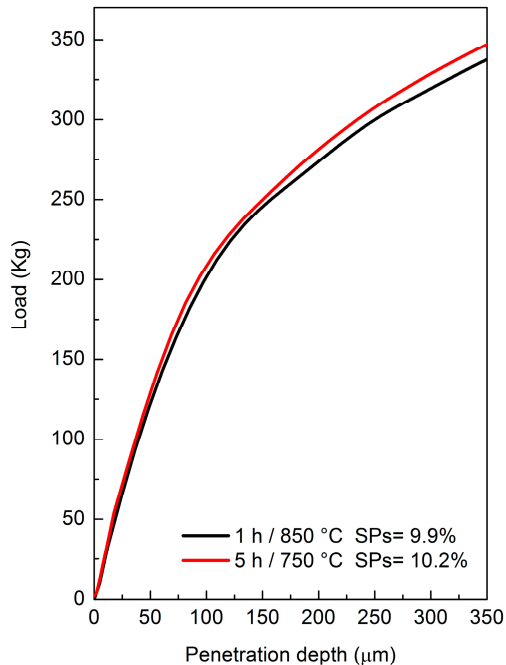

(b)

Supplement: s1 [file s1]

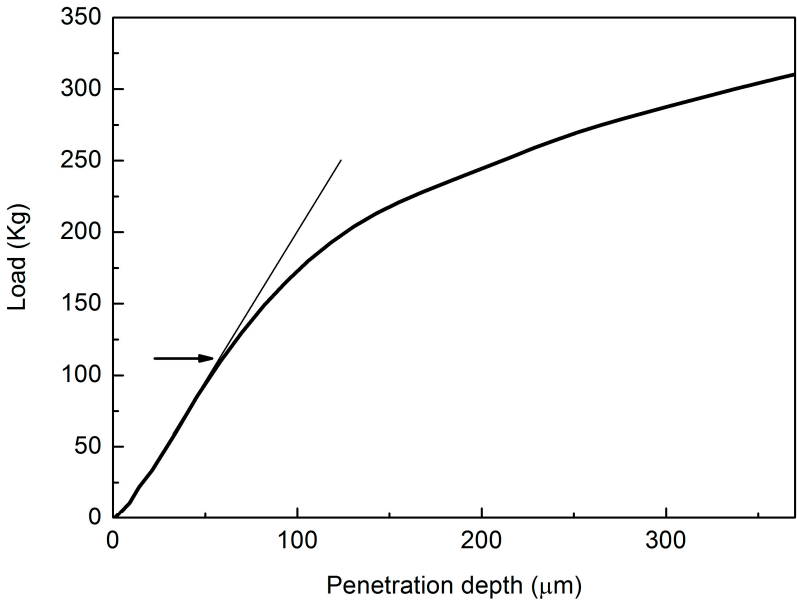

Supplement: s1 [file s1]

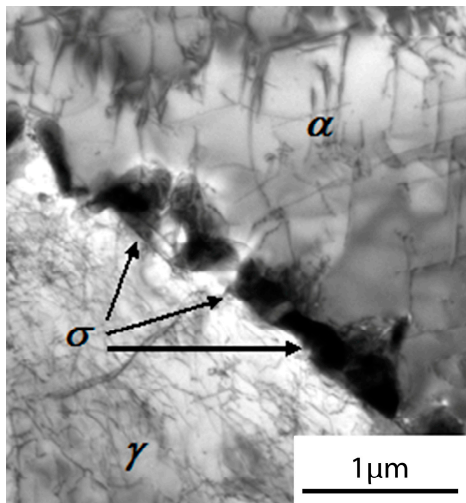

(a)

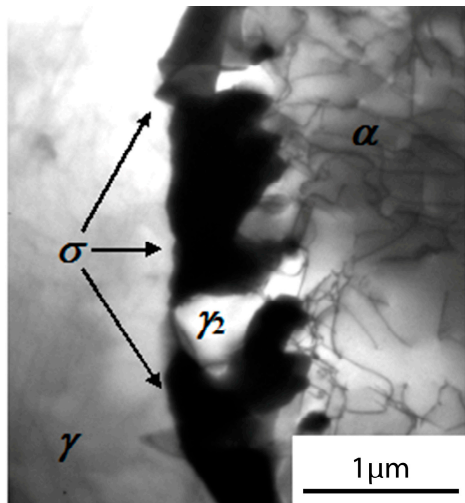

(b)

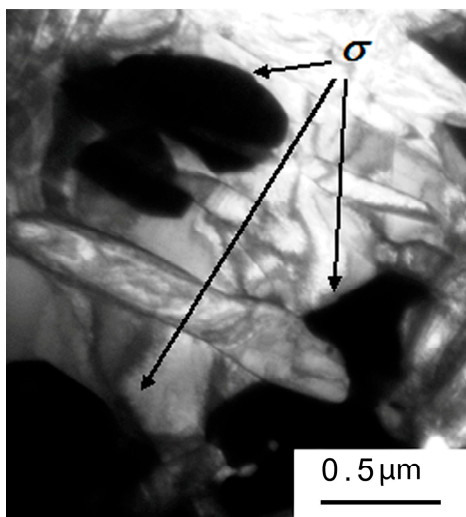

(c)

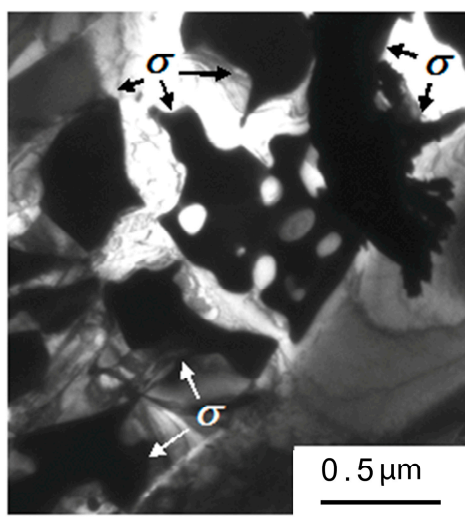

(d)

Supplement: s1 [file s1]

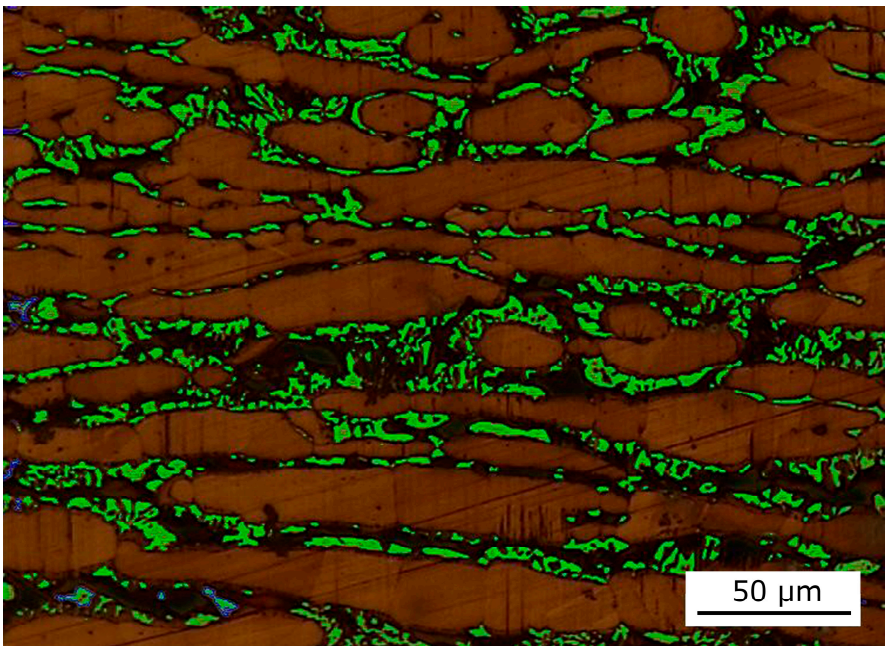

Supplement: s1 [file s1]
